# Supplementary material
Source: Springer Nature journal article supplement (https://www.springermedizin.de/resource/supplementary/12889_2012_4461_MOESM5_ESM.pdf/9493070)
Supplement: MOESM5 [file 9493070]

**Men**

MET-hours/week (square root transformed)

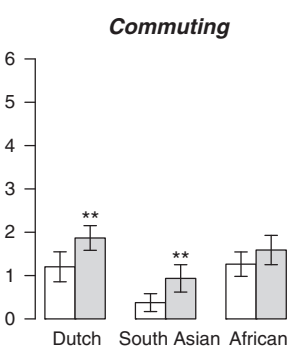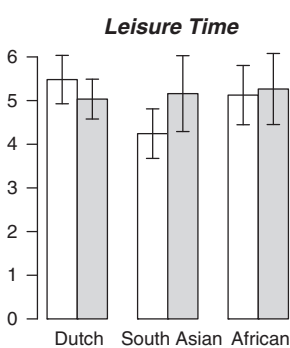

**Women**

MET-hours/week (square root transformed)

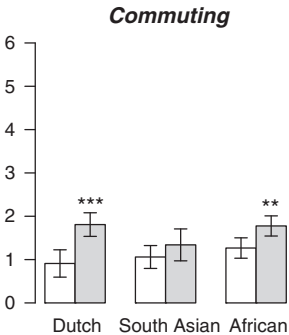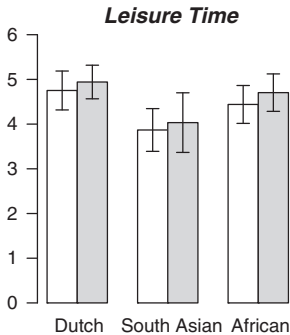

□ low occupational class  
■ high occupational class
